# Supplementary material
Source: MDPI journal article supplement (https://www.mdpi.com/2037-0164/15/1/15)
Supplement: s1 [file s1 › ijpb-2779201-SI.pdf]

## Supplementary Materials

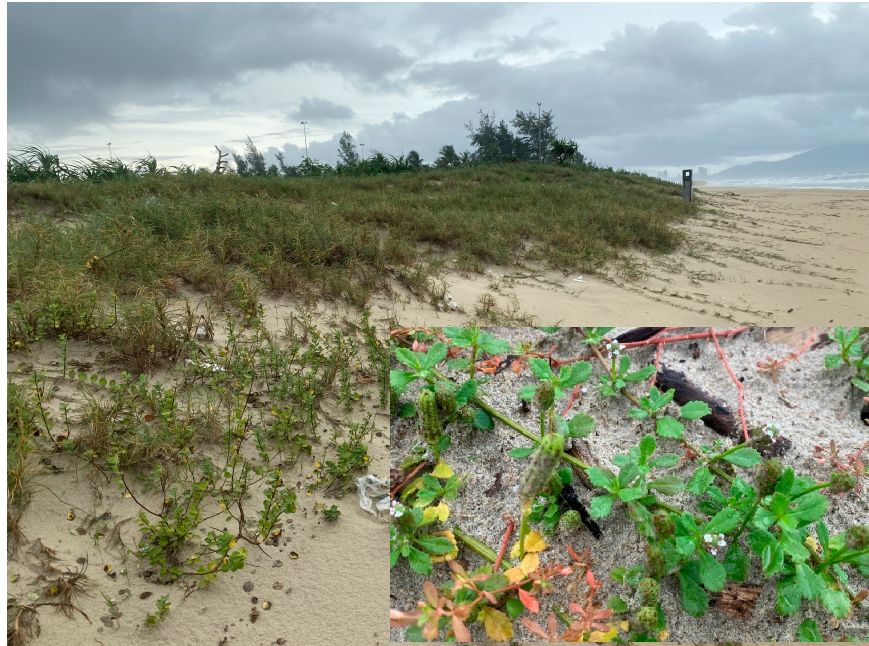

**Figure S1.** *P. nodiflora* plants growing in natural distribution area. Photos was taken in June 2022.

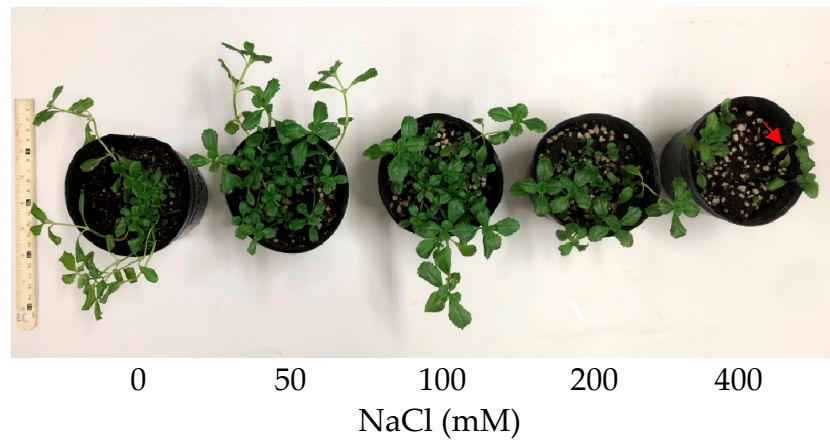

**Figure S2.** The appearance of *P. nodiflora* plants at 14 days after the onset of salt treatments. Arrow indicates a nodal site that leaves became yellow and fell down. Ruler = 20 cm.

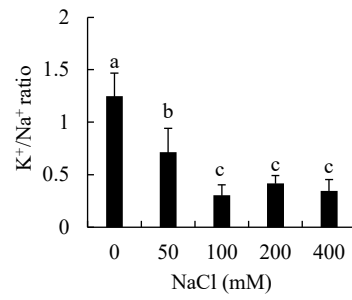

**Figure S3.** The K<sup>+</sup>/Na<sup>+</sup> content ratio of *P. nodiflora* leaves at 7 days after the onset of NaCl treatments. Error bars indicate standard deviations. Different letters represent significant differences between the treatments with  $p$ -value  $\leq 0.05$ .

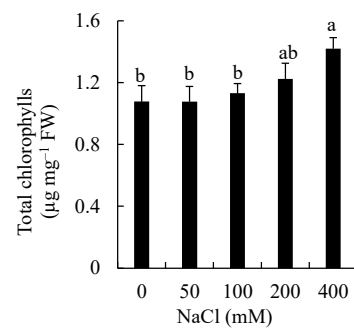

**Figure S4.** The content of total chlorophylls (chl *a* + chl *b*) of *P. nodiflora* shoots at 7 days after the onset of NaCl treatments. Error bars indicate standard deviations. Different letters represent significant differences between the treatments with  $p$ -value  $\leq 0.05$ . This data was presented in our previous report.
